# Supplementary material for: Structure of Staphylococcal Enterotoxin E in Complex with TCR Defines the Role of TCR Loop Positioning in Superantigen Recognition
Source: PubMed Central journal article supplement (PMC4492778; doi:10.1371/journal.pone.0131988), 2015-07-06
Supplement: pone.0131988.s002.pdf [file pone.0131988.s002.pdf]

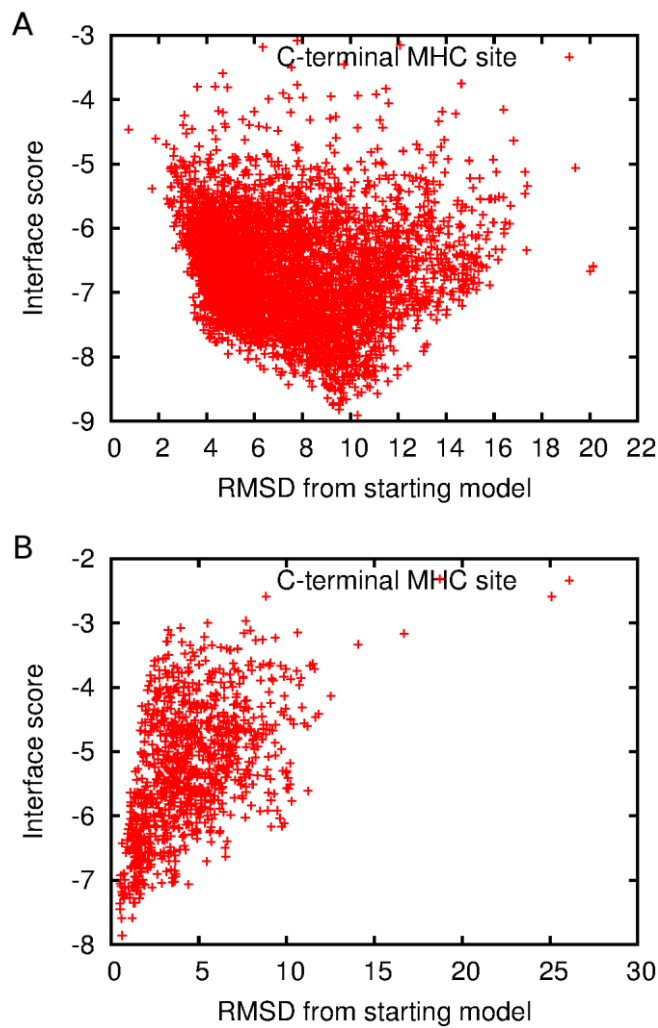

**S2 Fig. MHC modeled at the C-terminal, zinc bridged, site of SEE-TCR.** (A) Initial generation of 5000 models, plotted after interface score versus RMSD from the starting model. (B) Generation of 1000 models with the final model as starting point, to verify presence of a local energy minimum.
