# Supplementary material for: Structure of Staphylococcal Enterotoxin E in Complex with TCR Defines the Role of TCR Loop Positioning in Superantigen Recognition
Source: PubMed Central journal article supplement (PMC4492778; doi:10.1371/journal.pone.0131988), 2015-07-06
Supplement: pone.0131988.s003.pdf [file pone.0131988.s003.pdf]

```

          10          20          30          40          50          60
          |          |          |          |          |          |
SEE (PDB ID:4UDU) SEKSEEINEKDLRKKSELQ--RNALSNLRQIYYNEKAITENKESDDQFLENTLLFKGFFTGHPWYNDLL
SEB (PDB ID:1SBB) -ESQDPKPKDELHKSSKFT---GLMENMKVLYDD-NHVSAINVKSIDQFLYFDLIYSIKDTKLGNVDNVR
SEC3 (PDB ID:1JCK) -ESQDPMPDDLHKSSSEFT---GTMGNMKYLYDD-HYVSATKVKVSKDKFLAHDLIYNINDKLLNNYDKVK
SEG (PDB ID:3MC0) ---QDPKLDLNLKNSDYKSNKGTMGNVNMLYMS-PPVEGRGVINSRQFLSHDLIFPIEY---KSYNEVK
SEH (PDB ID:2XNA) -----EDLHDKSELT--DLALANAYGQYNH--PFIKENIKSDEISGEKDLIFRNQG---DSGNDLR
SEK (PDB ID:2NTS) -----QGDIGIDNLRFNYTKKDFVLDKDKDNDTPIANQLQFSN-----ESYDLI
SPE-A (PDB ID:1L0X) ---QQDPDPSQLHRSSLVK---NLQNIYFLYEG-DPVTHENVKSVDQLLSDLIYVNSG---PNYDKLK
SPE-C (PDB ID:1KTK) -----DSKKDI--SNVKSDDLAYATI-TPYDYKDCRV-NFSTHTLNIQTQYR-GKDYIIS
TSST-1 (PDB ID:3MFG) -----STN---DNIKDLLDWYSS-GSDTFTNSEVLD-NSLGSMRIKNTD---GSI SLI

          70          80          90          100          110          120
          |          |          |          |          |          |
SEE VDLGSKDATNKYKGGKVDLYGAYYGYQCAGGT-----PNKTACMYGGVTLHDNRLTEEKKVPI
SEB VEFKKNLADLADKYKDKYVDFGANYYQCYFSKKTNDINSHQTDKRRKTCMYGGVTEHNGNQLDKYSITVR
SEC3 TELLNEDLANKYKDEVDVYGSNYVNCYFSSKDNV---GKVTSGKTCMYGGITKHEGNHFDNGNLQNLV
SEG TELENTELANNYKGGKVDIFGVPFYFYTCIIPKSEPD---INQNFGGCCMYGGTLFNSE-NERDKLITVQ
SEH VKFATADLAQKFKNNKVDIYGASFYKCEKIS-----ENISECLYGGTTLNSE-KLAQERVIGAN
SEK SESKDFNKFSNFKGKLDVFGISYNGQSN-----TKYIYGGVTATNE-YLDKSRNIPIN
SPE-A TELKNQEMATLFPKDKNVDIYGVVEYHLCYLSN-----AERSACIYGGVTNHEGNHLEIPKKIVVK
SPE-C SEMSYEASQKFKRDDHVDVFLFYILNSH-----TGEYIYGGITPAQNNK--VNHKLLGN
TSST-1 IFPSPYSPAFTKGEKVDLNTKRTKKSQHTSE-----GTYIHFQISGVNTNEK--LPTPIELPLK

          130          140          150          160          170          180
          |          |          |          |          |          |
SEE LWIDGKQTTVPIDKVKTSKKEVTVQELDLQARHYLHGKFLYNSDS-----FGGKVQRGLIVF
SEB VFEDGKN--LLSFDVQTNKKKVTAEQELDYLTRHYLVKNKKLYEFN-----NSPYETGYIKF
SEC3 IRVYENKRNTISFEVQTDKKSVTAEQELDIKARNFLINKKLYEFN-----SSPYETGYIKF
SEG VTIDNRQ--SLGFTITTNKNMVTIQELDYKARHWTKEKKLYEFD-----GSAFESGYIKF
SEH VWVDGIQK--ETELIRTNKNVTLQELDIKIRKILSDKYKIYYKD-----SEISKGLIEF
SEK IWINGNHKTISTNKVSTNKKFVTAEIDVVKLRKYLQEEYNIYGHNGTKKGEEYGHKSKFYSGFNIGKVT
SPE-A VSIIDGIQ--SLSFDIETNKKMVTAEQELDYKVRKYLTDNKQLYTNG-----PSPYETGYIKF
SPE-C LFI SGESQONLNKIILEKDI VTFQEIDFKIRKYLMDNYKIYDAT-----SPYVSGRIEI
TSST-1 VKVHGKDSP-LKYWPKFDKQLAISTLDFEIRHQLTQIHGLYRS-----SDKTGGYWKI

          190          200          210          220          230
          |          |          |          |          |
SEE HSSEGSTVSYDLFDAQG--QYEDTLRLRIYRDNKTINSENL-HIDL YLYTT---
SEB IENE-NSFWYDMMPAPGD-KFDQSKYLMYNDNKMVDSKDV-KIEVYLTTKKK-
SEC3 IESNGNTFWYDMMPAPGD-KFDQSKYLMYKDNKMVDSKSV-KIEVHLTTKNG-
SEG TEKNNTSFWFDLFPKKELVFPFVFYKFLNIYGDNKVVDSKSI-KMEVFLNT---
SEH DMKTPRDYSFDIYDLKG---ENDYEIDKIYEDNKTLKSDDISHIDVNLTKKKV
SEK HLNNNDTFSYDLFYTGDD--DGLFKSFLKIYEDNKTVSEKFL-HLDVDISYKA--
SPE-A IPKNKESFWFDFFPEPE---FTQSKYLMYKDNETLDSNTS-QIEVYLTTK---
SPE-C GTKDGKHEQIDLFDSPN--EGTRSDIFAKYKDNRIINMKNFHFSDIYLEK---
TSST-1 TMNDGSTYQSDLSK-----KFEYNTEKPPINIDEIKTIEAEIN-----

```

**S3 Fig. Structure-based sequence alignment of superantigens.** Superantigens that have been structurally determined with TCR were structurally aligned using PROMALS3D (Pei et al, 2008). Amino acids important for TCR recognition for SEE are underlined, and conserved amino acids are marked in red.

Pei J, Kim BH, Grishin NV (2008) PROMALS3D: a tool for multiple protein sequence and structure alignments. *Nucleic Acids Res* **36**: 2295-2300
