# Supplementary material for: Structure of Staphylococcal Enterotoxin E in Complex with TCR Defines the Role of TCR Loop Positioning in Superantigen Recognition
Source: PubMed Central journal article supplement (PMC4492778; doi:10.1371/journal.pone.0131988), 2015-07-06
Supplement: pone.0131988.s004.pdf [file pone.0131988.s004.pdf]

**S1 Table. Constraints used for the Rosetta modeling of the MHC sites on the SEE-TCR structure. All**

constraints were set as atom pair constraints using a Gaussian functions with mean and standard deviations as specified. Residues are denoted s for SEE,  $\alpha$  for MHC $\alpha$ ,  $\beta$  for MHC $\beta$  and p for peptide.

| <b>Residue<br/>1</b>           | <b>Atom<br/>1</b> | <b>Residue<br/>2</b> | <b>Atom<br/>2</b> | <b>Mean</b> | <b>S.D.</b> |
|--------------------------------|-------------------|----------------------|-------------------|-------------|-------------|
| Low affinity MHC $\alpha$ site |                   |                      |                   |             |             |
| Phe47s                         | C $\epsilon$ 2    | Leu60 $\alpha$       | C $\delta$ 2      | 3.5         | 0.4         |
| Phe47s                         | C $\epsilon$ 1    | Ala64 $\alpha$       | C $\beta$         | 3.8         | 0.4         |
| Phe47s                         | O                 | Lys67 $\alpha$       | N $\zeta$         | 3.2         | 0.4         |
| Asp70s                         | O $\delta$ 1      | Lys39 $\alpha$       | N $\zeta$         | 3.0         | 0.2         |
| Asp70s                         | O $\delta$ 2      | Lys39 $\alpha$       | N $\zeta$         | 3.5         | 0.4         |
| High affinity MHC $\beta$ site |                   |                      |                   |             |             |
| Zn                             | Zn                | His81 $\beta$        | N $\delta$ 1      | 2.1         | 0.1         |
| Zn                             | Zn                | His187s              | N $\delta$ 1      | 2.1         | 0.1         |
| Zn                             | Zn                | His225s              | N $\epsilon$ 2    | 2.1         | 0.1         |
| Zn                             | Zn                | Asp227s              | O $\delta$ 2      | 2.1         | 0.1         |
| Gln135s                        | O $\epsilon$ 1    | Lys5p                | N                 | 3.0         | 0.4         |
| Gln135s                        | N $\epsilon$ 2    | Lys5p                | O                 | 3.0         | 0.4         |
