# Supplementary material for: Structure of Staphylococcal Enterotoxin E in Complex with TCR Defines the Role of TCR Loop Positioning in Superantigen Recognition
Source: PubMed Central journal article supplement (PMC4492778; doi:10.1371/journal.pone.0131988), 2015-07-06
Supplement: pone.0131988.s005.pdf [file pone.0131988.s005.pdf]

**S2 Table. Hydrogen bonds in the SEE-TCR complex.**

| SEE     |                | TRBV    |                | Distance |
|---------|----------------|---------|----------------|----------|
| Residue | Atom           | Residue | Atom           |          |
| Asn21   | O $\delta$ 1   | Gln55   | O $\epsilon$ 1 | 3.0      |
| Asn21   | N $\delta$ 2   | Leu56   | O              | 2.8      |
| Asn25   | O $\delta$ 1   | Gln55   | N              | 2.8      |
| Asn25   | N $\delta$ 2   | Gln55   | O              | 3.1      |
| Arg27   | N $\eta$ 1     | Ser67   | O $\gamma$     | 3.1      |
| Arg27   | N $\eta$ 2     | Ser67   | O $\gamma$     | 2.8      |
| Gln28   | O $\epsilon$ 1 | Arg70   | N              | 2.8      |
| Gln28   | N $\epsilon$ 2 | Arg70   | O              | 3.1      |
| Tyr32   | O $\eta$       | Glu69   | O $\epsilon$ 1 | 2.7      |
| Trp63   | N $\epsilon$ 1 | His30   | O              | 2.8      |
| Tyr64   | O $\eta$       | Asn52   | O $\delta$ 1   | 3.1      |
| Tyr64   | O $\eta$       | Glu53   | O $\epsilon$ 1 | 3.1      |
| Tyr64   | O $\eta$       | Glu53   | O $\epsilon$ 2 | 2.7      |
| Gly93   | N              | Glu53   | O $\epsilon$ 1 | 2.9      |
| Ser174  | O              | Gln81   | N $\epsilon$ 2 | 2.8      |
| Tyr205  | O $\eta$       | Leu56   | O              | 2.8      |
