# Supplementary material for: Structure of Staphylococcal Enterotoxin E in Complex with TCR Defines the Role of TCR Loop Positioning in Superantigen Recognition
Source: PubMed Central journal article supplement (PMC4492778; doi:10.1371/journal.pone.0131988), 2015-07-06
Supplement: pone.0131988.s006.pdf [file pone.0131988.s006.pdf]

**S3 Table. Intermolecular Van der Waals contacts (distances less than 4 Å) in the SEE-TCR complex.**

| <b>SEE</b> | <b>TCR</b> |
|------------|------------|
| Asn21      | Ser28      |
| Ser24      | Glu29      |
| Asn25      | His30      |
| Arg27      | Asn31      |
| Gln28      | Gln51      |
| Tyr32      | Asn52      |
| Asn33      | Glu53      |
| Pro62      | Ala54      |
| Trp63      | Gln55      |
| Tyr64      | Leu56      |
| Tyr91      | Glu57      |
| Tyr92      | Lys58      |
| Gly93      | Asp64      |
| Tyr94      | Arg65      |
| Ser172     | Ser67      |
| Ser174     | Ala68      |
| Phe175     | Glu69      |
| Tyr205     | Arg70      |
| Pro206     | Pro71      |
|            | Lys72      |
|            | Glu79      |
|            | Gln81      |
|            | Arg82      |
